# Supplementary material
Source: PubMed Central journal article supplement (PMC3341054)
Supplement: 1115361109_pnas.201115361SI.pdf [file 1115361109_pnas.201115361SI.pdf]

# Supporting Information

Rodriguez et al. 10.1073/pnas.1115361109

## SI Materials and Methods

In order to determine the viability of cells on selective plates lacking tryptophan, strains GCY2506 and GCY2512 containing both a G148T and *LYS2* mutation (Table S11) were transformed with *LYS2TCARev* (Table S12), which corrects the *LYS2* mutation, following the procedure in *Materials and*

*Methods*. For a given transformation, equal aliquots were plated on several synthetic dextrose-Trp-Lys plates and on the specified day, 500  $\mu$ L of 0.45% Trp was added to a plate. No growth was observed before Trp addition, and only cells transformed with the *LYS2TCARev* oligo were able to grow after Trp addition.

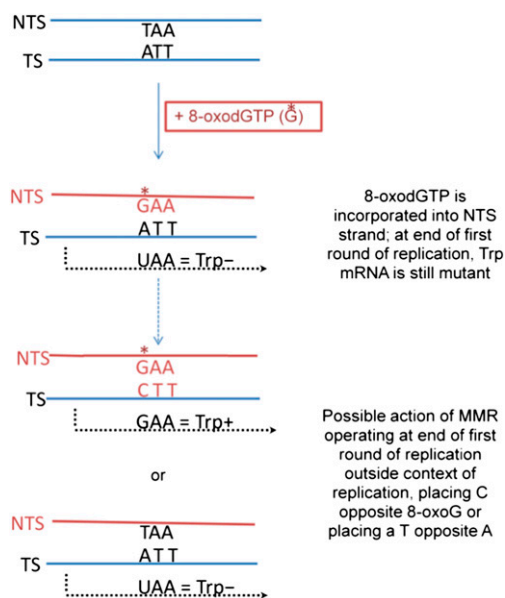

**Fig. S1.** Model for transformation of *trp5* G148T strains with 8-oxodGTP. TAA is the nontranscribed strand sequence of the mutant glutamic acid codon that must be mutated to GAA to give Trp<sup>+</sup> revertants in the G148T strains. At the end of the first round of replication, any transcribed RNA will be Trp<sup>-</sup>. Mismatch repair (MMR) correction operating outside the context of the replication fork after the first round of replication could result in a C being placed opposite the 8-oxoG, giving rise to Trp<sup>+</sup> mRNA.

**Table S1.** Data for Fig. 3: Transformation of *wt* and *msh6* strains with transcribed strand (TS) and nontranscribed strand (NTS) oligos

| Experiment | Strain  | MMR genotype | Trp oligo | No. Trp <sup>+</sup> in<br>25 mL 45 min | No. Trp <sup>+</sup> in<br>25 mL 2 h | % Trp at 45 min | SD   | Replication strand |
|------------|---------|--------------|-----------|-----------------------------------------|--------------------------------------|-----------------|------|--------------------|
| 1          | GCY2506 | <i>wt</i>    | NTS       | 2,643                                   | 7,010                                | 37.7            |      | Lagging            |
| 2          | GCY2506 | <i>wt</i>    | NTS       | 3,678                                   | 7,323                                | 50.2            |      | Lagging            |
| 3          | GCY2506 | <i>wt</i>    | NTS       | 2,588                                   | 5,058                                | 51.2            |      | Lagging            |
|            |         |              |           |                                         |                                      | 46              | 7.5  |                    |
| 1          | GCY2512 | <i>msh6</i>  | NTS       | 790                                     | 31,890                               | 2.5             |      | Lagging            |
| 2          | GCY2512 | <i>msh6</i>  | NTS       | 1,630                                   | 31,750                               | 5.1             |      | Lagging            |
| 3          | GCY2512 | <i>msh6</i>  | NTS       | 380                                     | 10,470                               | 3.6             |      | Lagging            |
|            |         |              |           |                                         |                                      | 3.7             | 1.3  |                    |
| 1          | GCY2506 | <i>wt</i>    | TS        | 213                                     | 415                                  | 51.2            |      | Leading            |
| 2          | GCY2506 | <i>wt</i>    | TS        | 360                                     | 570                                  | 63.2            |      | Leading            |
| 3          | GCY2506 | <i>wt</i>    | TS        | 600                                     | 1,170                                | 51.3            |      | Leading            |
| 4          | GCY2506 | <i>wt</i>    | TS        | 70                                      | 190                                  | 36.8            |      | Leading            |
|            |         |              |           |                                         |                                      | 50.6            | 10.8 |                    |
| 1          | GCY2512 | <i>msh6</i>  | TS        | 12,003                                  | 13,843                               | 86.7            |      | Leading            |
| 2          | GCY2512 | <i>msh6</i>  | TS        | 10,030                                  | 12,800                               | 78.4            |      | Leading            |
| 3          | GCY2512 | <i>msh6</i>  | TS        | 24,620                                  | 28,350                               | 86.8            |      | Leading            |
| 4          | GCY2512 | <i>msh6</i>  | TS        | 19,520                                  | 22,070                               | 88.4            |      | Leading            |
|            |         |              |           |                                         |                                      | 85.1            | 4.6  |                    |

Shown is the number of revertants in a 25-mL culture, plated after a recovery time of 45 min or 2 h. The mean and SD are given for each set of experiments.

**Table S2. Data for *trp5* G148T gene in inverted orientation (G148T R): Transformation of *wt* and *msh6* strains with TS and NTS oligos**

| Experiment | Strain  | MMR genotype | Trp oligo | No. Trp <sup>+</sup> in |           | % Trp at 45 min | SD   | Replication strand |
|------------|---------|--------------|-----------|-------------------------|-----------|-----------------|------|--------------------|
|            |         |              |           | 25 mL 45 min            | 25 mL 2 h |                 |      |                    |
| 1          | GCY2251 | <i>wt</i>    | NTS       | 730                     | 1,310     | 55.7            |      | Leading            |
| 2          | GCY2251 | <i>wt</i>    | NTS       | 145                     | 983       | 14.8            |      | Leading            |
| 3          | GCY2251 | <i>wt</i>    | NTS       | 640                     | 820       | 78.0            |      | Leading            |
| 4          | GCY2251 | <i>wt</i>    | NTS       | 160                     | 250       | 64.0            |      | Leading            |
| 5          | GCY2251 | <i>wt</i>    | NTS       | 530                     | 630       | 84.1            |      | Leading            |
| 6          | GCY2251 | <i>wt</i>    | NTS       | 610                     | 910       | 67.0            |      | Leading            |
|            |         |              |           |                         |           | 61              | 24.6 |                    |
| 1          | GCY2344 | <i>msh6</i>  | NTS       | 20                      | 810       | 2.5             |      | Leading            |
| 2          | GCY2140 | <i>msh6</i>  | NTS       | 190                     | 4,440     | 4.3             |      | Leading            |
| 3          | GCY2140 | <i>msh6</i>  | NTS       | 110                     | 8,715     | 1.3             |      | Leading            |
| 4          | GCY2140 | <i>msh6</i>  | NTS       | 340                     | 11,500    | 3.0             |      | Leading            |
|            |         |              |           |                         |           | 2.7             | 1.2  |                    |
| 1          | GCY2251 | <i>wt</i>    | TS        | 380                     | 668       | 56.9            |      | Lagging            |
| 2          | GCY2251 | <i>wt</i>    | TS        | 230                     | 530       | 43.4            |      | Lagging            |
| 3          | GCY2251 | <i>wt</i>    | TS        | 440                     | 700       | 62.9            |      | Lagging            |
| 4          | GCY2251 | <i>wt</i>    | TS        | 340                     | 640       | 53.1            |      | Lagging            |
|            |         |              |           |                         |           | 54.1            | 8.2  |                    |
| 1          | GCY2344 | <i>msh6</i>  | TS        | 22,120                  | 29,690    | 74.5            |      | Lagging            |
| 2          | GCY2344 | <i>msh6</i>  | TS        | 43,590                  | 44,070    | 98.9            |      | Lagging            |
| 3          | GCY2344 | <i>msh6</i>  | TS        | 31,580                  | 38,460    | 82.1            |      | Lagging            |
| 4          | GCY2140 | <i>msh6</i>  | TS        | 64,080                  | 74,870    | 85.6            |      | Lagging            |
| 5          | GCY2140 | <i>msh6</i>  | TS        | 97,320                  | 101,250   | 96.1            |      | Lagging            |
|            |         |              |           |                         |           | 87.4            | 10.1 |                    |

Shown is the number of revertants in a 25-mL culture, plated after a recovery time of 45 min or 2 h. The mean and SD are given for each set of experiments.

**Table S3. Data for Fig. 4B in *trp5* G148T F strains: Transformation by 8-oxodGTP**

| MMR genotype | Strain  | Recovery time | No. of revertants from 25-mL culture on the indicated day |       |       |       |       |       |       |
|--------------|---------|---------------|-----------------------------------------------------------|-------|-------|-------|-------|-------|-------|
|              |         |               | 3                                                         | 5     | 7     | 9     | 11    | 13    | 15    |
| <i>wt</i>    | GCY2506 | 15 min        | 285                                                       | 584   | 1,009 | 1,134 | 1,144 | 1,144 | 1,144 |
|              |         | 2 h           | 3,806                                                     | 4,136 | 4,266 | 4,276 | 4,296 | 4,296 | 4,296 |
| <i>wt</i>    | GCY1862 | 15 min        | 95                                                        | 345   | 593   | 805   | 1,028 | 1,030 | 1,030 |
|              |         | 2 h           | 1,655                                                     | 1,868 | 1,945 | 1,988 | 1,988 | 1,995 | 1,995 |
| <i>wt</i>    | GCY1862 | 15 min        | 130                                                       | 271   | 363   | 419   | 432   | 449   | 462   |
|              |         | 2 h           | 1,258                                                     | 2,030 | 2,068 | 2,090 | 2,118 | 2,118 | 2,118 |
| <i>wt</i>    | GCY1862 | 15 min        | 45                                                        | 95    | 150   | 163   | 188   | 218   | 218   |
|              |         | 2 h           | 398                                                       | 498   | 528   | 540   | 548   | 548   | 548   |
| <i>msh6</i>  | GCY2512 | 15 min        | 5                                                         | 15    | 15    | 15    | 15    | 25    | 25    |
|              |         | 2 h           | 3,686                                                     | 3,846 | 3,966 | 3,966 | 3,966 | 3,966 | 3,966 |
| <i>msh6</i>  | GCY2036 | 15 min        | 0                                                         | 3     | 3     | 8     | 15    | 15    | 15    |
|              |         | 2 h           | 1,113                                                     | 1,315 | 1,330 | 1,353 | 1,353 | 1,353 | 1,353 |
| <i>msh6</i>  | GCY2036 | 15 min        | 2                                                         | 5     | 10    | 12    | 15    | 17    | 17    |
|              |         | 2 h           | 2,053                                                     | 2,543 | 2,550 | 2,550 | 2,558 | 2,558 | 2,558 |
| <i>msh6</i>  | GCY2036 | 15 min        | 8                                                         | 10    | 10    | 13    | 13    | 13    | 13    |
|              |         | 2 h           | 333                                                       | 418   | 445   | 450   | 450   | 450   | 450   |

**Table S4. Table S3 data expressed as percentages**

| MMR genotype | Strain  | Recovery time | Percent of 2-h final number for each day |    |     |     |     |     |     |
|--------------|---------|---------------|------------------------------------------|----|-----|-----|-----|-----|-----|
|              |         |               | 3                                        | 5  | 7   | 9   | 11  | 13  | 15  |
| <i>wt</i>    | GCY2506 | 15 min        | 7                                        | 14 | 23  | 26  | 27  | 27  | 27  |
|              |         | 2 h           | 89                                       | 96 | 99  | 100 | 100 | 100 | 100 |
| <i>wt</i>    | GCY1826 | 15 min        | 5                                        | 17 | 30  | 40  | 52  | 52  | 52  |
|              |         | 2 h           | 83                                       | 94 | 97  | 100 | 100 | 100 | 100 |
| <i>wt</i>    | GCY1826 | 15 min        | 6                                        | 13 | 17  | 20  | 20  | 21  | 22  |
|              |         | 2 h           | 59                                       | 96 | 98  | 99  | 100 | 100 | 100 |
| <i>wt</i>    | GCY1826 | 15 min        | 8                                        | 17 | 27  | 30  | 34  | 40  | 40  |
|              |         | 2 h           | 73                                       | 91 | 96  | 99  | 100 | 100 | 100 |
| <i>msh6</i>  | GCY2512 | 15 min        | 0                                        | 0  | 0   | 0   | 0   | 1   | 1   |
|              |         | 2 h           | 93                                       | 97 | 100 | 100 | 100 | 100 | 100 |
| <i>msh6</i>  | GCY2036 | 15 min        | 0                                        | 0  | 0   | 1   | 1   | 1   | 1   |
|              |         | 2 h           | 82                                       | 97 | 98  | 100 | 100 | 100 | 100 |
| <i>msh6</i>  | GCY2036 | 15 min        | 0                                        | 0  | 0   | 0   | 1   | 1   | 1   |
|              |         | 2 h           | 80                                       | 99 | 100 | 100 | 100 | 100 | 100 |
| <i>msh6</i>  | GCY2036 | 15 min        | 2                                        | 2  | 2   | 3   | 3   | 3   | 3   |
|              |         | 2 h           | 74                                       | 93 | 99  | 100 | 100 | 100 | 100 |

**Table S5. Summary of Tables S3 and S4**

|                    | Average and SD for percentage data on each day |     |     |     |     |     |     |     |     |     |     |     |     |     |
|--------------------|------------------------------------------------|-----|-----|-----|-----|-----|-----|-----|-----|-----|-----|-----|-----|-----|
|                    | 3                                              | 5   | 7   | 9   | 11  | 13  | 15  |     |     |     |     |     |     |     |
| <i>wt</i> 15 min   | 7                                              | 14  | 23  | 26  | 27  | 27  | 27  |     |     |     |     |     |     |     |
|                    | 5                                              | 17  | 30  | 40  | 52  | 52  | 52  |     |     |     |     |     |     |     |
|                    | 6                                              | 13  | 17  | 20  | 20  | 21  | 22  |     |     |     |     |     |     |     |
|                    | 8                                              | 17  | 27  | 30  | 34  | 40  | 40  |     |     |     |     |     |     |     |
| Avg/SD             | 6.4                                            | 1.4 | 15  | 2.4 | 24  | 5.5 | 29  | 8.6 | 33  | 13  | 35  | 14  | 35  | 13  |
| <i>wt</i> 2 h      | 89                                             | 96  | 99  | 100 | 100 | 100 | 100 |     |     |     |     |     |     |     |
|                    | 83                                             | 94  | 97  | 100 | 100 | 100 | 100 |     |     |     |     |     |     |     |
|                    | 59                                             | 96  | 98  | 99  | 100 | 100 | 100 |     |     |     |     |     |     |     |
|                    | 73                                             | 91  | 96  | 99  | 100 | 100 | 100 |     |     |     |     |     |     |     |
| Avg/SD             | 76                                             | 13  | 94  | 2.5 | 98  | 1.2 | 99  | 0.6 | 100 | 0.0 | 100 | 0.0 | 100 | 0.0 |
| <i>msh6</i> 15 min | 0                                              | 0   | 0   | 0   | 0   | 1   | 1   |     |     |     |     |     |     |     |
|                    | 0                                              | 0   | 0   | 1   | 1   | 1   | 1   |     |     |     |     |     |     |     |
|                    | 0                                              | 0   | 0   | 0   | 1   | 1   | 1   |     |     |     |     |     |     |     |
|                    | 2                                              | 2   | 2   | 3   | 3   | 3   | 3   |     |     |     |     |     |     |     |
| Avg/SD             | 0.5                                            | 0.9 | 0.8 | 1.0 | 0.8 | 0.9 | 1.1 | 1.2 | 1.2 | 1.1 | 1.3 | 1.1 | 1.3 | 1.1 |
| <i>msh6</i> 2h     | 93                                             | 97  | 100 | 100 | 100 | 100 | 100 |     |     |     |     |     |     |     |
|                    | 82                                             | 97  | 98  | 100 | 100 | 100 | 100 |     |     |     |     |     |     |     |
|                    | 80                                             | 99  | 100 | 100 | 100 | 100 | 100 |     |     |     |     |     |     |     |
|                    | 74                                             | 93  | 99  | 100 | 100 | 100 | 100 |     |     |     |     |     |     |     |
| Avg/SD             | 82                                             | 7.9 | 97  | 2.7 | 99  | 0.8 | 100 | 0.2 | 100 | 0.0 | 100 | 0.0 | 100 | 0.0 |

The averages and SDs are plotted in Fig. 4B.

**Table S6. Data for transformation by 8-oxodGTP in *trp5* G148T R strains**

| MMR genotype | Strain  | Recovery time | No. of revertants from 25-mL culture on the indicated day |       |       |       |       |       |       |
|--------------|---------|---------------|-----------------------------------------------------------|-------|-------|-------|-------|-------|-------|
|              |         |               | 3                                                         | 5     | 7     | 9     | 11    | 13    | 15    |
| <i>wt</i>    | GCY2251 | 15 min        | 65                                                        | 140   | 148   | 163   | 183   | 183   | 183   |
|              |         | 2 h           | 1,029                                                     | 1,099 | 1,159 | 1,159 | 1,179 | 1,179 | 1,179 |
| <i>wt</i>    | GCY1718 | 15 min        | 35                                                        | 80    | 133   | 160   | 200   | 240   | 265   |
|              |         | 2 h           | 425                                                       | 500   | 515   | 545   | 550   | 555   | 560   |
| <i>wt</i>    | GCY1718 | 15 min        | 17                                                        | 27    | 43    | 55    | 67    | 80    | 108   |
|              |         | 2 h           | 193                                                       | 265   | 285   | 303   | 325   | 343   | 348   |
| <i>wt</i>    | GCY1718 | 15 min        | 20                                                        | 30    | 40    | 45    | 48    | 48    | 48    |
|              |         | 2 h           | 115                                                       | 145   | 160   | 168   | 168   | 168   | 168   |
| <i>msh6</i>  | GCY2344 | 15 min        | 0                                                         | 5     | 5     | 5     | 5     | 5     | 5     |
|              |         | 2 h           | 1,089                                                     | 1,119 | 1,239 | 1,239 | 1,239 | 1,239 | 1,239 |

**Table S7. Table S6 data expressed as percentages**

| MMR genotype | Strain  | Recovery time | Percent of 2-h final number for each day |    |     |     |     |     |     |
|--------------|---------|---------------|------------------------------------------|----|-----|-----|-----|-----|-----|
|              |         |               | 3                                        | 5  | 7   | 9   | 11  | 13  | 15  |
| <i>wt</i>    | GCY2251 | 15 min        | 6                                        | 12 | 13  | 14  | 16  | 16  | 16  |
|              |         | 2 h           | 87                                       | 93 | 98  | 98  | 100 | 100 | 100 |
| <i>wt</i>    | GCY1718 | 15 min        | 6                                        | 14 | 24  | 29  | 36  | 43  | 47  |
|              |         | 2 h           | 76                                       | 89 | 92  | 97  | 100 | 100 | 100 |
| <i>wt</i>    | GCY1718 | 15 min        | 5                                        | 8  | 12  | 16  | 19  | 23  | 31  |
|              |         | 2 h           | 55                                       | 76 | 82  | 87  | 100 | 100 | 100 |
| <i>wt</i>    | GCY1718 | 15 min        | 12                                       | 18 | 24  | 27  | 29  | 29  | 29  |
|              |         | 2 h           | 68                                       | 86 | 95  | 100 | 100 | 100 | 100 |
| <i>msh6</i>  | GCY2344 | 15 min        | 0                                        | 0  | 0   | 0   | 0   | 0   | 0   |
|              |         | 2 h           | 88                                       | 90 | 100 | 100 | 100 | 100 | 100 |

**Table S8. Summary of data in Tables S6 and S7**

|                  |      | Average and SD for percentage data on each day |      |     |      |     |      |     |       |     |       |      |       |      |
|------------------|------|------------------------------------------------|------|-----|------|-----|------|-----|-------|-----|-------|------|-------|------|
|                  |      | 3                                              | 5    | 7   | 9    | 11  | 13   | 15  |       |     |       |      |       |      |
| <i>wt</i> 15 min |      | 6                                              | 12   | 13  | 14   | 16  | 16   | 16  |       |     |       |      |       |      |
|                  |      | 6                                              | 14   | 24  | 29   | 36  | 43   | 47  |       |     |       |      |       |      |
|                  |      | 5                                              | 8    | 12  | 16   | 19  | 23   | 31  |       |     |       |      |       |      |
|                  |      | 12                                             | 18   | 24  | 27   | 29  | 29   | 29  |       |     |       |      |       |      |
| Avg/SD           | 7.1  | 3.2                                            | 12.9 | 4.2 | 18.1 | 6.5 | 21.2 | 7.5 | 24.8  | 9.1 | 27.5  | 11.6 | 30.6  | 13.1 |
| <i>wt</i> 2,h    |      | 87                                             | 93   | 98  | 98   | 100 | 100  | 100 |       |     |       |      |       |      |
|                  |      | 76                                             | 89   | 92  | 97   | 100 | 100  | 100 |       |     |       |      |       |      |
|                  |      | 55                                             | 76   | 82  | 87   | 100 | 100  | 100 |       |     |       |      |       |      |
|                  |      | 68                                             | 86   | 95  | 100  | 100 | 100  | 100 |       |     |       |      |       |      |
| Avg/SD           | 71.8 | 13.3                                           | 86.2 | 7.3 | 91.9 | 7.1 | 95.7 | 5.8 | 100.0 | 0.0 | 100.0 | 0.0  | 100.0 | 0.0  |

**Table S9. Viability of cells on plates**

| MMR genotype* | Revertants appearing after indicated number of days before adding Trp |              |              |
|---------------|-----------------------------------------------------------------------|--------------|--------------|
|               | 3                                                                     | 6 (% of 3 d) | 9 (% of 3 d) |
| <i>wt</i>     | 1,552                                                                 | 1,044 (67)   | 724 (47)     |
| <i>msh6</i>   | 1,909                                                                 | 1,119 (59)   | 764 (40)     |

\*See SI Materials and Methods.

**Table S10. Effect of MMR on C-T vs. G-A mismatch**

| Strain no.       | MMR genotype | Oligo | Mispair created | Replication strand for oligo | Average Trp <sup>+</sup> revertants with 2-h recovery time | SD of average | Independent experiments | <i>msh6/wt</i> Revertants |
|------------------|--------------|-------|-----------------|------------------------------|------------------------------------------------------------|---------------|-------------------------|---------------------------|
| GCY2506          | <i>wt</i>    | TS    | C-T             | Leading                      | 590                                                        | 520           | 4                       |                           |
| GCY2251          | <i>wt</i>    | TS    | C-T             | Lagging                      | 630                                                        | 70            | 4                       |                           |
| GCY2251          | <i>wt</i>    | NTS   | G-A             | Leading                      | 820                                                        | 360           | 6                       |                           |
| GCY2506          | <i>wt</i>    | NTS   | G-A             | Lagging                      | 6500                                                       | 1,200         | 3                       |                           |
| GCY2512          | <i>msh6</i>  | TS    | C-T             | Leading                      | 19,000                                                     | 7,300         | 4                       | 32                        |
| GCY2140, GCY2344 | <i>msh6</i>  | TS    | C-T             | Lagging                      | 58,000                                                     | 30,000        | 5                       | 92                        |
| GCY2344          | <i>msh6</i>  | NTS   | G-A             | Leading                      | 6,400                                                      | 4,700         | 4                       | 8                         |
| GCY2512          | <i>msh6</i>  | NTS   | G-A             | Lagging                      | 25,000                                                     | 12,000        | 3                       | 4                         |

The average number of total Trp<sup>+</sup> revertants in both *trp5* G148T F and R strains after a long recovery time is shown, and the number of revertants in *msh6* compared with wild-type strains is given.

**Table S11. Yeast strains**

| Strain  | <i>trp5</i> mutation and orientation | MMR genotype       |
|---------|--------------------------------------|--------------------|
| GCY1718 | G148T R                              | <i>wt</i>          |
| GCY1862 | G148T F                              | <i>wt</i>          |
| GCY2036 | G148T F                              | <i>msh6Δ::kan</i>  |
| GCY2140 | G148T R                              | <i>msh6Δ::kan</i>  |
| GCY2251 | G148T R                              | <i>wt</i>          |
| GCY2344 | G148T R                              | <i>msh6Δ::loxP</i> |
| GCY2512 | G148T F                              | <i>msh6Δ::kan</i>  |
| GCY2506 | G148T F                              | <i>wt</i>          |

All strains are derivatives of *Saccharomyces cerevisiae* GCY1487 (SJR828a) (*MATα his3Δ200 ura3-52 leu2Δ1*) (1). In addition, GCY2506, GCY2251, GCY2512, and GCY2344 contained a *LYS2* mutation (beginning at nucleotide position 1264 TCT to TGA). All *msh6* deletions were created by one-step disruption with PCR-generated fragments. The *msh6Δ::kan* deletion was made from a PCR fragment generated from the collection of yeast gene deletions (2). For the *msh6Δ::loxP* deletion, the PCR fragment was from a strain in which *MSH6* had been disrupted by a loxP-kanMX-loxP fragment that was subsequently excised by Cre expression (3).

1. Williams T-M, Fabbri RM, Reeves JW, Crouse GF (2005) A new reversion assay for measuring all possible base pair substitutions in *Saccharomyces cerevisiae*. *Genetics* 170:1423–1426.
2. Winzeler EA, et al. (1999) Functional characterization of the *S. cerevisiae* genome by gene deletion and parallel analysis. *Science* 285:901–906.
3. Güldener U, Heck S, Fielder T, Beinhauer J, Hegemann JH (1996) A new efficient gene disruption cassette for repeated use in budding yeast. *Nucleic Acids Res* 24:2519–2524.

**Table S12. Oligo sequences**

| Oligo      | Sequence                                 |
|------------|------------------------------------------|
| NTS        | ATGGTGGTGTAGATATCATCGAATTGGGTATGCCCTTCTC |
| TS         | GAGAAGGGCATACCCAATTCGATGATATCTACACCACCAT |
| LYS2TCARev | CCAACCCTATCTTTCACATCAGGTTCCGAAGGTATTCTA  |
